# Supplementary material
Source: PubMed Central journal article supplement (PMC5523878)
Supplement: NIHMS883004-supplement-Figure_S1.pdf [file NIHMS883004-supplement-Figure_S1.pdf]

## Supplemental Figures

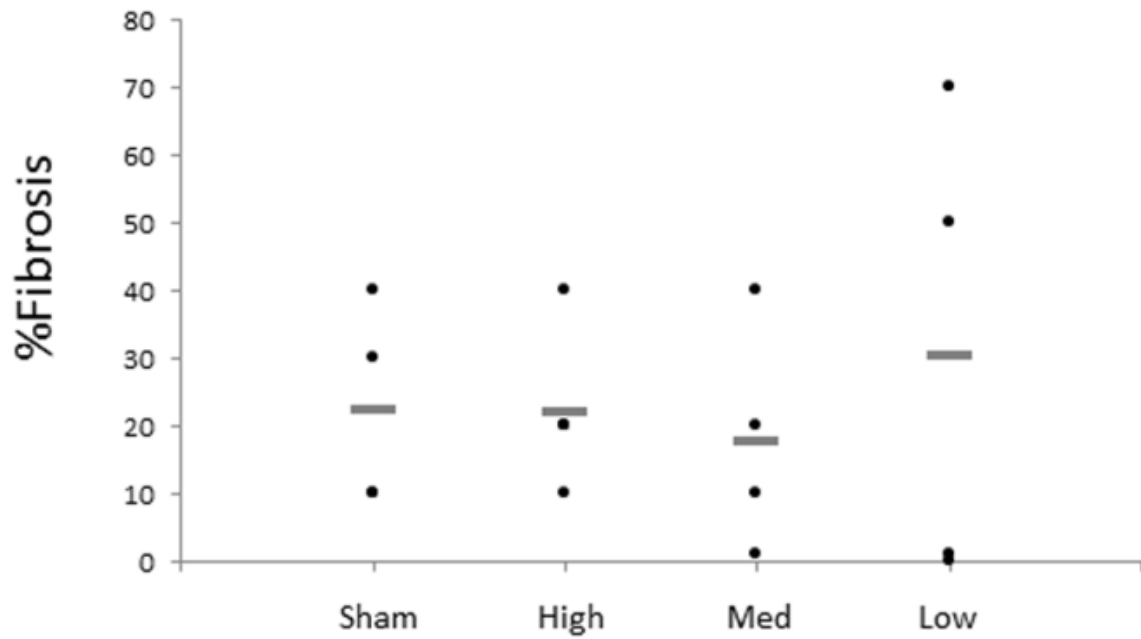

### Supplemental Figure 1. Infarct size

This figure shows % fibrosis in the central infarct area of the left ventricle in each animal. There was no significant difference between treated groups and sham. There was no significant difference between treated groups and sham by one way ANOVA.
