# Supplementary material
Source: PubMed Central journal article supplement (PMC5523878)
Supplement: NIHMS883004-supplement-Figure_S2.pdf [file NIHMS883004-supplement-Figure_S2.pdf]

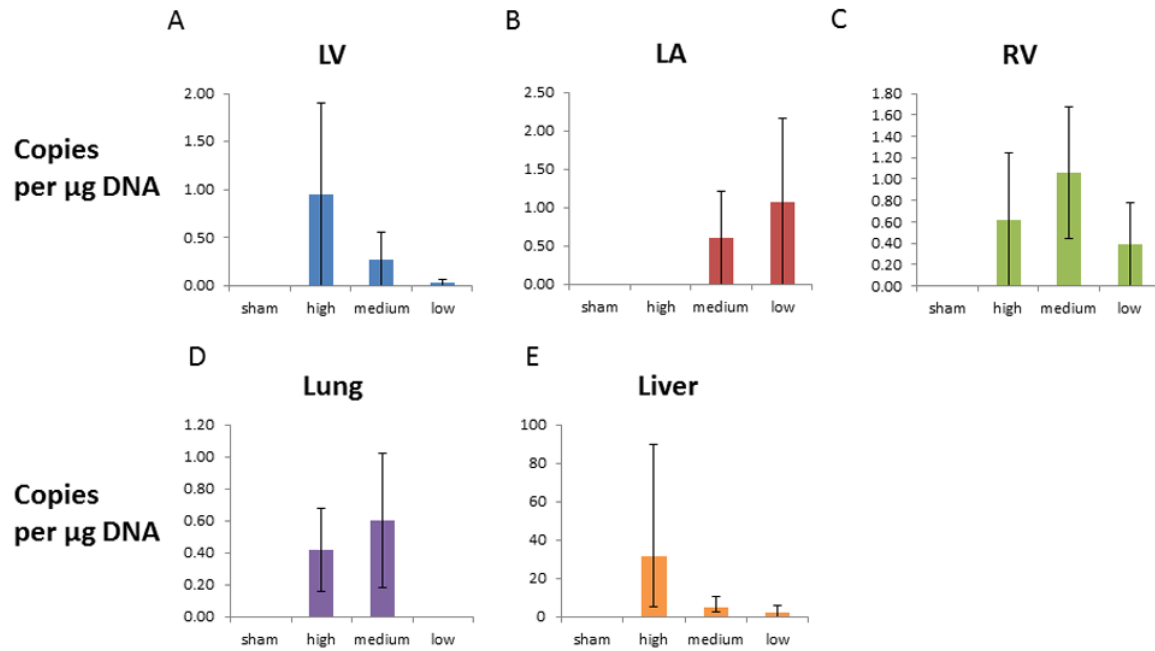

**Supplemental Figure 2. Gene distribution in the organs.**

There was no significant difference in the mean AAV copy number per µg of DNA extracted from the left ventricle (LV;A), left atrium (LA;B) and right ventricle (RV;C), lung (D) and liver (E) between groups by one way ANOVA.
