# Supplementary material
Source: PubMed Central journal article supplement (PMC5523878)
Supplement: NIHMS883004-supplement-Table_S1.pdf [file NIHMS883004-supplement-Table_S1.pdf]

**Supplemental Table 1. Right Heart Hemodynamic Measurements**

|              | Day -14    |                |                 |                 |             |
|--------------|------------|----------------|-----------------|-----------------|-------------|
| <b>Group</b> | <b>CVP</b> | <b>PAP Sys</b> | <b>PAP Dias</b> | <b>PAP Mean</b> | <b>PCWP</b> |
| High         | 5.4 ± 1.2  | 17.8 ± 2.6     | 11.8 ± 1.5      | 14.8 ± 2.0      | 5.8 ± 1.1   |
| Medium       | 5.0 ± 1.6  | 19.3 ± 2.3     | 11.8 ± 1.7      | 16.3 ± 2.3      | 10.5 ± 1.7  |
| Low          | 2.8 ± 0.6  | 17.3 ± 1.6     | 9.3 ± 0.8       | 13.0 ± 0        | 6.0 ± 0.7   |
| Sham         | 2.8 ± 0.5  | 17.0 ± 0.9     | 8.3 ± 0.5       | 12.0 ± 1.5      | 5.5 ± 0.6   |
|              | Day 0      |                |                 |                 |             |
| High         | 6.4 ± 0.9  | 18.8 ± 1.2     | 11.8 ± 1.1      | 15.8 ± 0.9      | 10.2 ± 1.4  |
| Medium       | 4.0 ± 1.2  | 18.3 ± 0.7     | 11.3 ± 1.5      | 15.7 ± 0.7      | 7.0 ± 1.5   |
| Low          | 3.3 ± 0.9  | 18.5 ± 3.2     | 12.5 ± 2.1      | 13.0 ± 2.4      | 7.0 ± 1.5   |
| Sham         | 10.8 ± 1.2 | 21.8 ± 3.0     | 14.0 ± 2.3      | 18.0 ± 3.2      | 11.8 ± 1.9  |
|              | Day 56     |                |                 |                 |             |
| High         | 5.2 ± 0.5  | 20.6 ± 2.0     | 10.4 ± 0.7      | 15.2 ± 0.9      | 9.6 ± 1.1   |
| Medium       | 4.8 ± 0.5  | 22.0 ± 2.0     | 13.3 ± 0.5      | 17.3 ± 1.1      | 15.0 ± 3.2  |
| Low          | 6.8 ± 1.4  | 22.5 ± 1.8     | 14.8 ± 1.7      | 19.3 ± 1.3      | 12.5 ± 0.9  |
| Sham         | 6.8 ± 1.3  | 25.0 ± 1.4     | 15.8 ± 2.4      | 20.0 ± 1.7      | 10.5 ± 0.5  |

Data are shown as mean ± SEM. CVP: central venous pressure, PAP: pulmonary artery pressure, Sys:

systolic, Dias: diastolic, PCWP: pulmonary capillary wedge pressure.
