# Supplementary material
Source: PubMed Central journal article supplement (PMC5523878)
Supplement: NIHMS883004-supplement-Table_S2.pdf [file NIHMS883004-supplement-Table_S2.pdf]

**Supplemental Table 2: Animals with the indicated anti-AAV6 antibody titer / number of animals tested**

|        | <b>Titer</b> | <b>Day-14</b> | <b>Day 0</b> | <b>Day 14</b> | <b>Day 28</b>     | <b>Day 56</b>                         |
|--------|--------------|---------------|--------------|---------------|-------------------|---------------------------------------|
| High   | <800         | 5/5           | 5/5          | 3/5           | 4/5               | 5/5                                   |
|        | 800          | 0/5           | 0/5          | 2/5           | 1/5               | 0/5                                   |
| Medium | <800         | 4/4           | 4/4          | 4/4           | 3/4               | 3/4                                   |
|        | 800          | 0/4           | 0/4          | 0/4           | 1/4 <sup>1)</sup> | 1/4 <b>Error!</b><br><b>Reference</b> |

|      |      |     |     |     |     | source<br>not<br>found. |
|------|------|-----|-----|-----|-----|-------------------------|
| Low  | <800 | 4/4 | 4/4 | 3/4 | 4/4 | 4/4                     |
|      | 800  | 0/4 | 0/4 | 1/4 | 0/4 | 0/4                     |
| Sham | <800 | 4/4 | 4/4 | 4/4 | 4/4 | 4/4                     |

**Error! Reference source not found.**

Different animals at these 2 time points
