# Supplementary material
Source: PubMed Central journal article supplement (PMC5523878)
Supplement: NIHMS883004-supplement-Table_S3.pdf [file NIHMS883004-supplement-Table_S3.pdf]

**Supplemental Table 3: Animals with the indicated number of cytokine-secreting cells  
(spots)(medium-corrected)/number of animals tested**

| Group       | Number of spots | Antigen |     |     |     |
|-------------|-----------------|---------|-----|-----|-----|
|             |                 | RM1     | RM2 | VP1 | VP2 |
| High-dose   | <10             | 4/5     | 4/5 | 5/5 | 4/5 |
|             | 10-25           | 1/5     | 1/5 | 0/5 | 1/5 |
|             | >25             | 0/5     | 0/5 | 0/5 | 0/5 |
| Medium-dose | <10             | 1/4     | 3/4 | 4/4 | 4/4 |
|             | 10-25           | 3/4     | 1/4 | 0/4 | 0/4 |
|             | >25             | 0/4     | 0/4 | 0/4 | 0/4 |
| Low-dose    | <10             | 4/4     | 4/4 | 4/4 | 3/4 |
|             | 10-25           | 0/0     | 0/0 | 0/0 | 1/4 |
|             | >25             | 0/0     | 0/0 | 0/0 | 0/0 |
| Sham        | <10             | 4/4     | 4/4 | 4/4 | 4/4 |
|             | 10-25           | 0/4     | 0/4 | 0/4 | 0/4 |
|             | >25             | 0/4     | 0/4 | 0/4 | 0/4 |

Algorithm: <10 spots = Negative; 10-25 spots = Equivocal; >25 spots = Positive, RM1 = ribonucleotide reductase catalytic subunit, RM2 = ribonucleotide reductase free radical-containing subunit, VP = viral capsid protein.
