# Supplementary material
Source: PubMed Central journal article supplement (PMC5523878)
Supplement: NIHMS883004-supplement-Table_S4.pdf [file NIHMS883004-supplement-Table_S4.pdf]

**Supplemental Table 4: Animals with the indicated levels of troponin I / number of animals tested**

|        | <b>Troponin I</b><br>(ng/mL) <sup>1)</sup> | <b>BL</b> | <b>Day 0</b> | <b>Day 14</b> | <b>Day 28</b> | <b>Day 56</b> |
|--------|--------------------------------------------|-----------|--------------|---------------|---------------|---------------|
| High   | <0.2                                       | 5/5       | 5/5          | 5/5           | 4/5           | 4/5           |
|        | 0.2-0.4                                    | 0/5       | 0/5          | 0/5           | 0/5           | 0/5           |
|        | 0.4-1.5                                    | 0/5       | 0/5          | 0/5           | 1/5           | 1/5           |
| Medium | <0.2                                       | 4/4       | 4/4          | 3/4           | 4/4           | 3/4           |
|        | 0.2-0.4                                    | 0/4       | 0/4          | 1/4           | 0/4           | 0/4           |
|        | 0.4-1.5                                    | 0/4       | 0/4          | 0/4           | 0/4           | 1/4           |
| Low    | <0.2                                       | 4/4       | 4/4          | 4/4           | 4/4           | 4/4           |
| Sham   | <0.2                                       | 4/4       | 4/4          | 2/4           | 2/4           | 3/4           |
|        | 0.2-0.4                                    | 0/4       | 0/4          | 1/4           | 1/4           | 1/4           |
|        | 0.4-1.5                                    | 0/4       | 0/4          | 1/4           | 1/4           | 0/4           |

<sup>1)</sup>The lower limit of detection of the assay is 0.2 ng/mL; 99th percentile of upper reference level is 0.4 ng/mL.
