# Supplementary material
Source: PubMed Central journal article supplement (PMC5523878)
Supplement: NIHMS883004-supplement-Table_S5.pdf [file NIHMS883004-supplement-Table_S5.pdf]

**Supplemental Table 5. Pre-Procedural Induction Agents**

14

| <b>Medication</b> | <b>Type</b> | <b>Dose and Route</b> | <b>Duration and Frequency</b> |
|-------------------|-------------|-----------------------|-------------------------------|
|-------------------|-------------|-----------------------|-------------------------------|

|               |                              |                            |                             |
|---------------|------------------------------|----------------------------|-----------------------------|
| Enrofloxacin  | Antibiotic                   | 2-8 mg/kg, IM              | ≥ 30 minutes before surgery |
| Telazol       | Dissociative Anesthetic      | 2-7 mg/kg, IM              | Induction                   |
| Propofol      | Sedative/Anesthetic          | 2-10 mg/kg, IV             | Induction                   |
| Buprenorphine | Opioid Anesthetic            | .01-0.1 mg/kg, IM          | Induction                   |
| Amiodarone    | Antiarrhythmic               | 150 mg IV over 10 minutes  | Induction                   |
| Lidocaine     | Antiarrhythmic/Antispasmodic | 1-5 mg/kg/hr bolus or drip | Induction                   |
