# Supplementary material
Source: PubMed Central journal article supplement (PMC5523878)
Supplement: NIHMS883004-supplement-Table_S6.pdf [file NIHMS883004-supplement-Table_S6.pdf]

**Supplemental Table 6. Peri-procedural Medications**

| <b>Medication</b> | <b>Type</b>                  | <b>Dose and Route</b>                                      | <b>Duration and Frequency</b> |
|-------------------|------------------------------|------------------------------------------------------------|-------------------------------|
| Isoflurane        | Anesthetic                   | 0.5-3.0%, inhalant                                         | Periprocedurally, to effect   |
| Amiodarone        | Antiarrhythmic               | 150 mg over 10 minutes; 1 mg/kg/hr, IV during procedure    | Periprocedurally              |
| Lidocaine         | Antiarrhythmic/Antispasmodic | 1-5 mg/kg/hr bolus or drip                                 | Periprocedurally              |
| Epinephrine       | Vasodilator/Resuscitation    | 1mg/ml, 0.1 ml diluted into 9.9ml saline in a 10cc syringe | Periprocedurally, as needed   |
| Magnesium Sulfate | Antiarrhythmic               | 500mg/ml, 1000mg in a 3cc syringe                          | Periprocedurally, as needed   |
| Calcium Chloride  | Antiarrhythmic               | 100 mg/ml, 1000 mg in a 10cc syringe                       | Periprocedurally, as needed   |
| LRS or Equivalent | Fluid maintenance            | 1-10 ml/kg/hr, IV                                          | Periprocedurally              |

|               |                 |                         |                                                 |
|---------------|-----------------|-------------------------|-------------------------------------------------|
| Heparin       | Anticoagulation | 100-200 units/kg,<br>IV | Periprocedurally, as<br>needed to keep ACT >300 |
| Nitroglycerin | Vasodilator     | 1ug/kg/min, IV          | Periprocedurally                                |
